# Supplementary material
Source: PubMed Central journal article supplement (PMC3975260)

## Supplemental Data

### Supplemental Methods

#### Reagents, flow cytometry and neutrophil isolation

Recombinant murine MIP-2, TNF $\alpha$  (both from PeproTech Inc, NJ) and chemoattractant peptide fMLF (Sigma) were used at the indicated concentrations. Poly-RGD peptides at 20  $\mu$ g/ml (Sigma), human plasma fibrinogen at 150  $\mu$ g/ml (ICN Biomedicals) were used to coat plates as previously described (Pereira and Lowell, *J. Immunol.* 2003: **171**:1319-1327). Fluo-4 (Invitrogen) was used at 5 $\mu$ M. Thapsigargin (Sigma) was used at 10 nM and the pan PLC inhibitor U-73122 was used at 3 $\mu$ M. For flow cytometry, single cell suspensions from spleens and bone marrow were prepared and stained as previously described (Scapini, Hu et al. *J Exp Med* 2010: **207**(8): 1757-1773) with anti-mouse mAbs against CD45.1 (A20) or CD45.2 (104), CD11b (M1/70) or CD11a (MEM-25), Ly6G (IA8) all from BD Pharmingen or eBiosciences. Five-color flow cytometry was performed on a modified Becton Dickinson FACScan and data analyzed with FlowJo software (Tree Star, Inc.). Rabbit anti-PLC $\gamma_2$  (Santa Cruz, CA), anti-phospho-p40<sup>phox</sup>, anti-Erk1/2 (both from Cell Signaling), anti-phospho-p47<sup>phox</sup> (Assay Biotech), mouse anti-PKC $\alpha$  or PKC $\beta$  (Becton Dickinson) were used for immunoblotting as described below. Bone marrow-derived neutrophils were isolated as described previously (Pereira and Lowell, *ibid*). Immediately after purification, cells were resuspended in HBSS with 20 mM HEPES pH7.4 (termed HBSS/H) unless otherwise indicated (UCSF).

#### Immunoprecipitation and blotting

Cells were solubilized in lysis buffer (1% Nonidet P-40, 50mM NaCl, 50mM Tris.HCl [pH 7.4]), containing 5 mM EDTA, 1 mM NaF, leupeptin (1  $\mu$ g/ml), aprotinin (10  $\mu$ g/ml), pepstatin A (1  $\mu$ g/ml), 2 mM sodium orthovanadate, and phenylmethylsulfonyl fluoride (100  $\mu$ g/ml).

Immunoprecipitations were carried out by adding rabbit anti-PLC $\gamma_2$ , incubating at 4°C overnight followed by addition of protein G- agarose beads. Immune complexes were subjected to SDS-PAGE then transferred onto nitrocellulose membranes. Immunoblots were blocked with 5% milk in PBST (PBS with 0.1% Tween 20) for 1 hr and then incubated overnight with 4G10 anti-phosphotyrosine mAb (Cell Signaling) in 5% BSA PBST. Anti-PKC and anti-phospho-p40<sup>phox</sup> immunoblotting was done similarly with membrane fractions or whole cell lysates, respectively. Immunoblots were imaged with IR-labeled secondary antibodies using the Licor Odyssey system or with HRP-conjugated secondary antibodies followed by ECL detection (Amersham).

### **PKC $\alpha/\beta$ intracellular staining**

Neutrophils were plated on pRGD-coated cover slips at 37°C for 10 minutes then fixed in 1% paraformaldehyde for 10 minutes at RT. Cells were washed twice, blocked/permeablized with PBS/10% FCS/0.2% Triton X100 for 30 minutes, and stained with anti-PKC $\alpha$  or PKC $\beta$  (Becton Dickinson) antibody (1  $\mu$ g/ml) in PBS/5% FCS/0.2% Triton X100 at 4°C in the dark overnight. Cells were washed in PBS/5% FCS/0.2% Triton X100 and stained with Alexa488-conjugated secondary Ab (1  $\mu$ g/ml) at RT in the dark for 1 hour, washed three times and immediately photographed (see below). As controls, secondary Ab staining alone or staining of PKC $\alpha/\beta$ <sup>-/-</sup> neutrophils were performed.

### **Subcellular fractionation**

Isolated neutrophils ( $2 \times 10^7$ ) were stimulated fMLF (2.5 nM) in 0.2% milk blocked dishes for 3 minutes, cells were collected, pelleted and frozen in liquid nitrogen. Then the cells were resuspended in 250 $\mu$ l relaxation buffer (10 mM HEPES, [pH 7.4], 100 mM KCl, 3 mM NaCl, 3.5mM MgCl<sub>2</sub>, 1 mM PMSF, 10  $\mu$ g/ml leupeptin, and 10  $\mu$ g/ml aprotinin) then sonicated for 6 seconds. Nuclei, granules, and unbroken cells were removed by centrifugation at 860 g for 10 mins at 4°C. Supernatants were ultracentrifuged at 100,000 g for 30 minutes at 4°C to separate cytosol and membrane fractions. Supernatants were collected (cytosol), or pellets (membrane) were resuspended in 80  $\mu$ l 1% N- Octylglucoside (Boehringer Mannheim). Membrane fractions were added to 4X sample buffer and boiled for 10 min. Proteins were subjected to SDS-PAGE and Western blotting with mouse anti-PKC $\alpha$ , PKC $\beta$  with rabbit anti-actin as a loading control.

### **Microscopy**

For fluorescence microscopy image acquisition was achieved with an inverted Axiovert 200 M microscope and a  $\times 63/1.4$  lens (Carl Zeiss, NJ), equipped with a 175 W xenon highspeed DG4 wavelength selector and a single emission filter wheel (Sutter Instruments, Novato, CA), a PI piezoelectric z-drive (Physik Instrument, Germany), and a cooled-CCD Coolsnap camera (Roper Instruments, NJ). Data were acquired and analyzed with Image J (NIH) analysis software. Light micrographs were taken with a Olympus BX41 microscope (Melville, NY) using 10X and 40X Olympus Apochromat objectives. Images were collected with an Olympus DP21 camera running the Olympus CellSens image acquisition software.

### **Supplemental Figure Legends**

**Supplemental Figure 1. WT and *stim1*<sup>-/-</sup> neutrophils show equal expression of CD11a and CD11b.** Neutrophils from WT or *stim1*<sup>-/-</sup> chimeric mice, either resting or stimulated for 5 mins with the indicated agents (MIP-2 at 10 ng/ml; fMLF at 2.5 nM) at 37°C, were then stained with anti-CD11a or anti-CD11b mAbs and subjected to flow cytometry.

**Supplemental Figure 2. *Stim1*<sup>-/-</sup> neutrophils have defective phagocytosis of Ig opsonized *Staph aureus* bacteria and reduced degranulation of lactoferrin.** (A) WT and *stim1*<sup>-/-</sup> neutrophils ( $5 \times 10^6$  in one ml) were incubated with Ig-opsonized Alexa-488 labeled *S. aureus* particles ( $10^8$ ) in HBSS media, in the presence or absence of fMLF (2.5 nM) or thapsigargin (100 nM) and with or without EGTA (4 mM) in the media, at 37°C with gentle rocking. Samples (200  $\mu$ l) were removed at the indicated time points and fixed by addition of an equal amount of 2% paraformaldehyde, then kept on ice. Cells were washed twice, suspended in PBS and subjected to flow cytometry. The percentage of neutrophils showing fluorescent *S. aureus* at each time point is plotted. (B) WT and *stim1*<sup>-/-</sup> neutrophils ( $2 \times 10^5$ /well) were plated on fibrinogen or RGD peptide-coated microtiter wells in the presence or absence of TNF $\alpha$  (10 ng/ml) or EGTA (4 mM). Cells were incubated for 5 min at 37°C then Ig-opsonized Alexa-488 labeled *S. aureus* beads ( $10^7$ ) were added to each well and cells were gently rocked at 37°C for 1 hr. Following, an equal volume (200  $\mu$ l) of cold 2% paraformaldehyde was added to stop the reaction and total fluorescence was measured before and then after 5 gentle washes to remove unphagocytosed beads, using a Spectramax 2e. Data are plotted as the percent of fluorescence after the washes divided by the total, averaged for 6 wells each group ( $\pm$  SD). (C) WT and *stim1*<sup>-/-</sup> neutrophils were plated on plastic cover slips in 6 well tissue culture dishes and allowed to phagocytose Ig-opsonized Alex-488 labeled *S. aureus* beads as described above. After 1 hour, cells were fixed

with 2% cold paraformaldehyde and stained with rhodamin-phalloidin to visualize polymerized actin (as described in Zhang et al, 2006). Images were acquired in the green and red channels at 100X magnification using a Zeis Axiophot fluorescence microscope. (D) WT and *stim1*<sup>-/-</sup> neutrophils (2 X 10<sup>5</sup> per well) were plated on uncoated, fibrinogen or RGD peptide-coated microtiter plates in the presence or absence of fMLF (2.5 nM), TNF $\alpha$  (10 ng/ml), thapsigargin (100 nM), EGTA (4 mM) or phorbol 12-myristate 13-acetate (PMA) (1 ng/ml) for 90 minutes at 37°C. Cell supernants (100  $\mu$ l) were removed and assayed for the secondary granule protein lactoferrin by ELISA assay as described (Mocsai, et al, 1999). Data are mean ( $\pm$  SD  $n=6$  wells each) and are representative of at least 3 independent experiments. \*  $p<0.05$ , \*\*  $p<0.01$  and \*\*\*  $p<0.001$  comparing WT to *stim1*<sup>-/-</sup> in each group.

**Supplemental Figure 3. Defective activation of the NADPH oxidase in *stim1*<sup>-/-</sup> can be rescued by PMA treatment.** WT neutrophils (2 X 10<sup>5</sup>/well) were plated in cytochrome C containing HBSS without Ca<sup>2+</sup>, or with the indicated concentrations of Ca<sup>2+</sup> added, in 96 well plates pre-coated with 0.2% milk in the presence of fMLF (2.5 nM) (A) or fibrinogen 10  $\mu$ g/ml in the presence of TNF- $\alpha$  (B). Reduction of cytochrome C was monitored in a Spectramax plate reader at 37°C over the indicated time period. (C) WT neutrophils were plated on fibrinogen (10  $\mu$ g/ml) in the presence or absence of TNF- $\alpha$  (10 ng/ml) or fMLF (2.5 nM) and reduction of cytochrome C was monitored. The PLC inhibitor U73122 was added where indicated. WT and *stim1*<sup>-/-</sup> neutrophils were plated on fibrinogen (10  $\mu$ g/ml) in the presence or absence of TNF- $\alpha$  (10 ng/ml) (D) or 0.2% milk in the presence of fMLF (2.5 nM) (E) and reduction of cytochrome C was monitored. (F) WT and *stim1*<sup>-/-</sup> neutrophils were plated in cytochrome C containing HBSS with 3 mM Ca<sup>2+</sup> and PMA (1 ng/ml), in 96 well plates pre-coated with 2% milk and cytochrome

C reduction was monitored. Data are mean ( $\pm$  SD  $n=3$  wells each) and are representative of at least three independent experiments.

**Supplemental Figure 4. STIM1-deficient neutrophils migrate normally into the ischemic liver.** (A) WT or *stim1*<sup>-/-</sup> chimeric mice were subjected to liver ischemia/reperfusion injury by ligation of the portal vein and hepatic artery for 30 min followed by 3 hours of reperfusion. Mice were then sacrificed and liver sections were immunostained with anti-Gr-1 to reveal neutrophils in the liver parenchyma. Liver sections from mice not subjected to ischemia/reperfusion injury showed virtually no Gr-1+ cells (not shown).

# Supplemental Fig. 1

Zhang et al

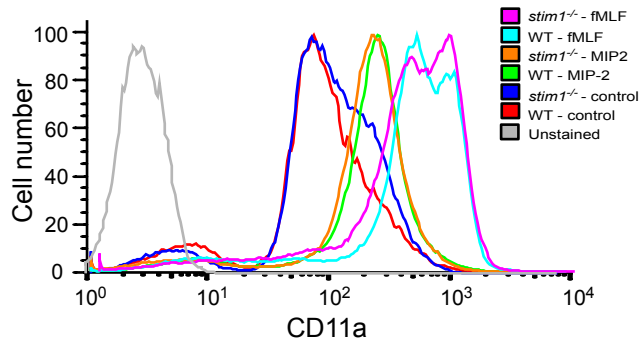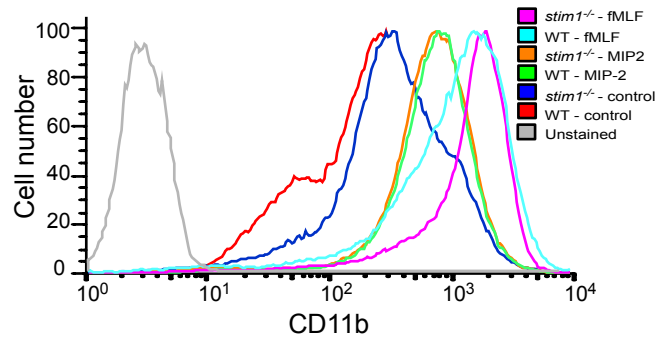

# Supplemental Fig. 2

Zhang et al

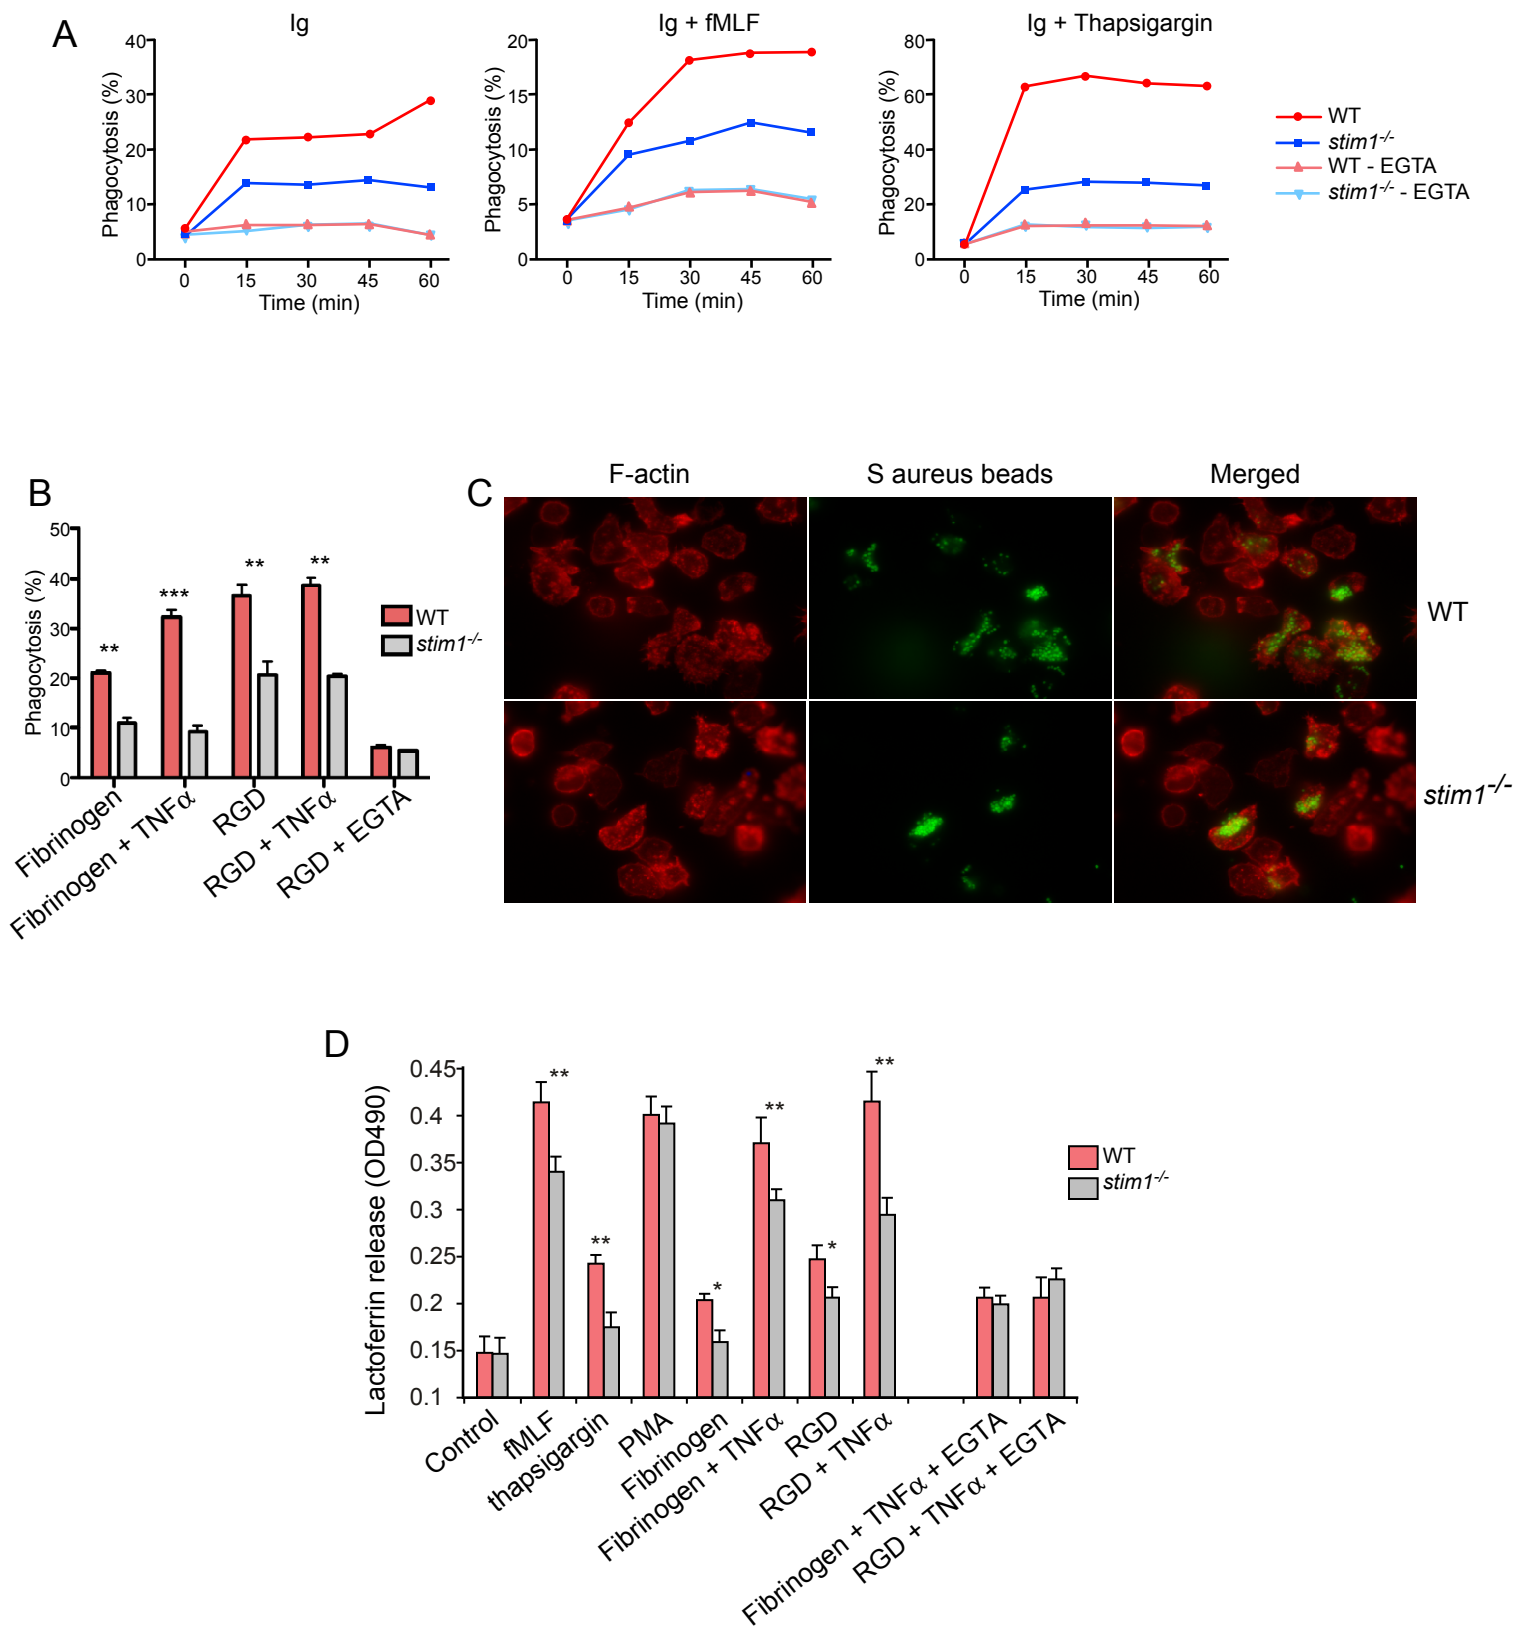



# Supplemental Fig. 3

Zhang et al

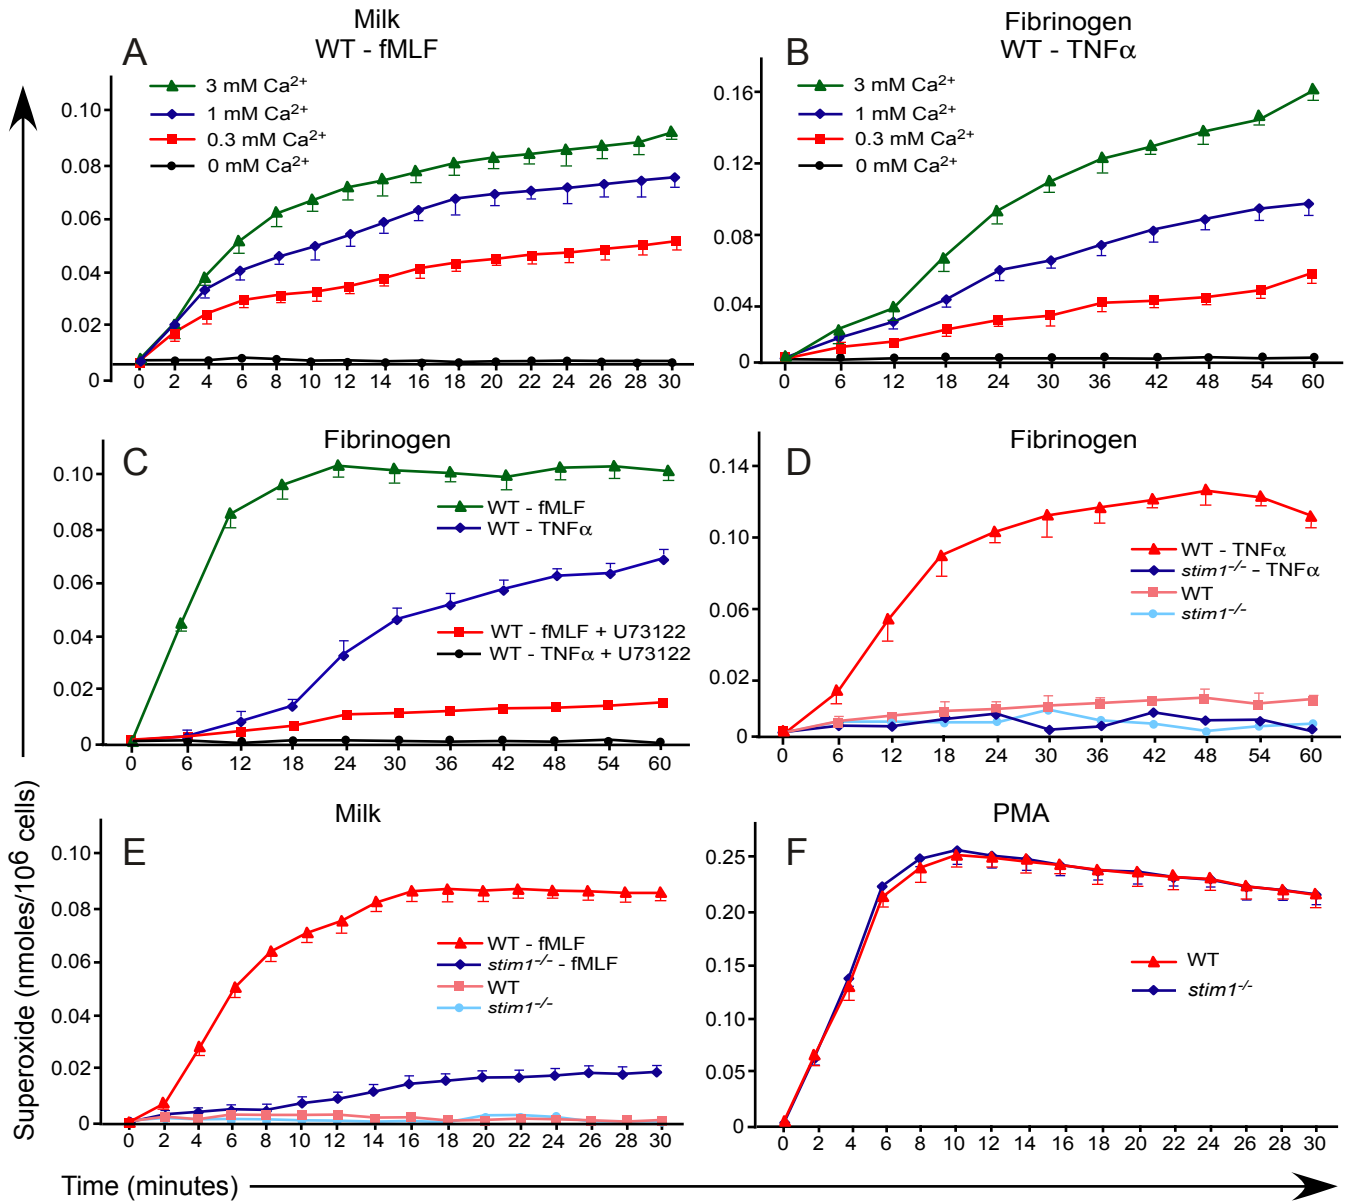

# Supplemental Fig. 4

Zhang et al

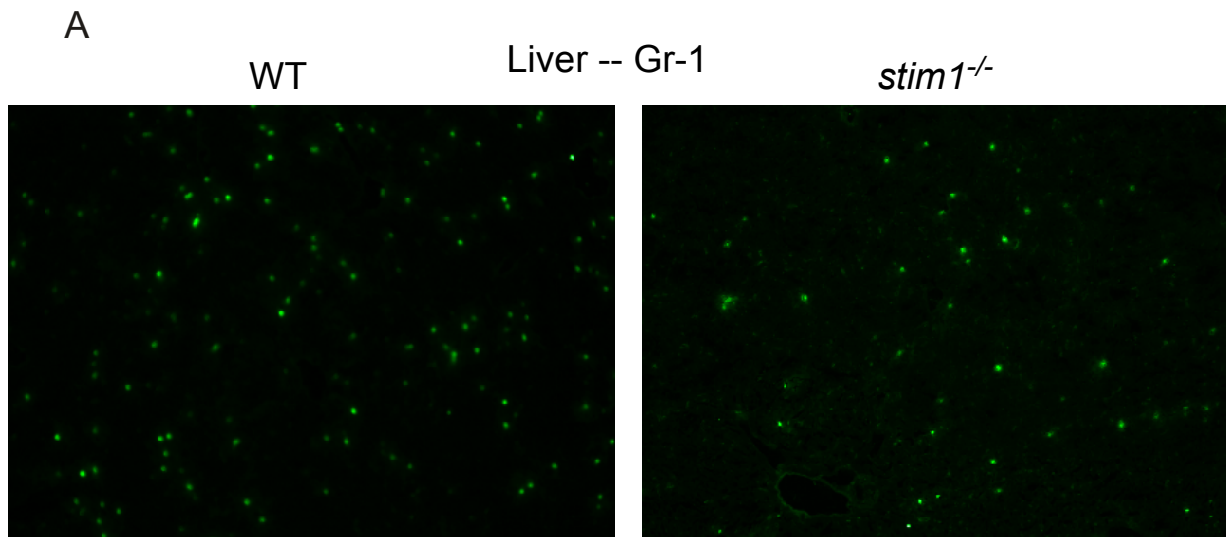

Supplement: supp_blood-2012-08-450403_blood-2012-08-450403-1.pdf [file supp_blood-2012-08-450403_blood-2012-08-450403-1.pdf]
